# Supplementary material
Source: PubMed Central journal article supplement (PMC6733610)
Supplement: NIHMS1523878-supplement-2.pdf [file NIHMS1523878-supplement-2.pdf]

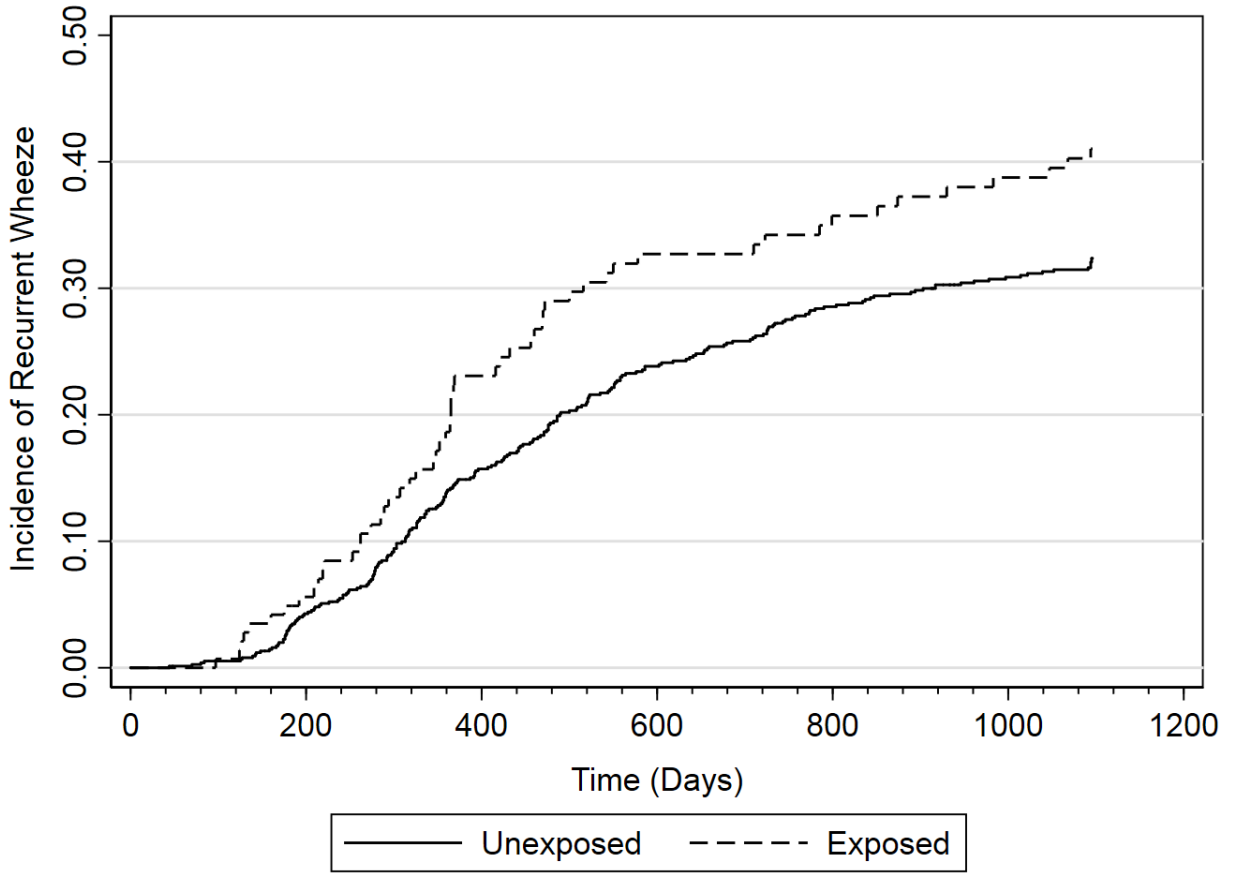

1 **Online Supplement**

2

3 **Title:** Prenatal exposure to acid suppressant medications and the risk of recurrent wheeze at 3  
4 years of age in children with a history of severe bronchiolitis

5

6 **Authors:** Lacey B. Robinson MD<sup>a</sup>, Anna J. Chen Arroyo MD MPH<sup>b</sup>, Marina A. S. Dantas MD<sup>c</sup>,  
7 Janice A. Espinola MPH<sup>c</sup>, Ashley F. Sullivan MPH MS<sup>c</sup> and Carlos A. Camargo Jr. MD DrPH  
8 FAAAAI<sup>ac</sup>

9

10 a: Division of Rheumatology, Allergy and Immunology, Massachusetts General Hospital,  
11 Harvard Medical School, 55 Fruit Street, Cox 201 Boston MA 02114, USA,  
12 lbrobinson@mgh.harvard.edu

13

14 b: Division of Rheumatology, Immunology and Allergy, Brigham and Women's Hospital,  
15 Harvard Medical School, 60 Fenwood Road, Building of Transformative Medicine 5002B,  
16 Boston MA 02115, USA, acarroyo@bwh.harvard.edu

17

18 c: Emergency Medicine Network, Department of Emergency Medicine, Massachusetts General  
19 Hospital, Harvard Medical School, 125 Nashua Street, Suite 920, Boston MA 02114, USA.  
20 mdantas@mgh.harvard.edu, espinola@helix.mgh.harvard.edu, afsullivan@partners.org,  
21 ccamargo@partners.org

22

23 **Corresponding author:** Lacey B. Robinson MD, Massachusetts General Hospital, 55 Fruit  
24 Street, Cox 201 Boston MA 02114, USA. Phone: 303-668-5477 Email:  
25 lbrobinson@mgh.harvard.edu

26

## 27 **Table of Contents**

- 28 • Detailed Methods
- 29 • Additional Results
- 30 • Table E1
- 31 • Table E2
- 32 • Figure E1

33

34

35

## 36 Detailed Methods

### 37 Study Design and Study Population

38 The 35<sup>th</sup> Multicenter Airway Research Collaboration (MARC-35) is a multicenter prospective  
39 cohort study of infants less than 1 year of age enrolled during an episode of severe bronchiolitis  
40 from 2011-2014. Severe bronchiolitis was defined by the need for hospitalization. The study was  
41 conducted at 17 sites in the U.S. using a standardized protocol, details of which have been  
42 previously published.<sup>(E1)</sup> Children who met the endpoint of recurrent wheeze prior to study entry  
43 were excluded.

44

45

46 We enrolled 1016 children in the study, of which 921 children were followed in the longitudinal  
47 cohort. The analytic cohort for the present analysis was defined as the 900 (98%) participants in  
48 the longitudinal cohort with complete exposure and outcome data. At the time of enrollment, a  
49 parent participated in a detailed in-person interview to capture demographic, parental health,  
50 perinatal and child health information. The subject's parent subsequently underwent structured  
51 telephone interview by trained study staff every 6 months. Blood samples were obtained from all  
52 participants at enrollment. Serum was analyzed for multiple parameters including total  
53 immunoglobulin E (IgE) level. Allergen testing was performed by Phadia Immunology  
54 Reference Laboratory (Portage, MI). This analysis was a pre-determined secondary analysis.

55

56 The study was approved by the institutional review board at each participating site and  
57 conducted in accordance with Good Clinical Practice Standards. Written informed consent was  
58 obtained from the parent or guardian of each study subject.

59

**60 Exposure**

61 The maternal use of ASM (PPI or H2RA) during pregnancy was obtained from the parent by  
62 questionnaire at enrollment. The following questions were used to determine exposure status:

- 63 • “When pregnant with your child, did you/the biological mother take H2 blockers or  
64 proton pump inhibitors for gastroesophageal reflux (heartburn, GERD) or ulcers?  
65 Examples were provided. Respondents were instructed not to include antacids.
- 66 • If the response was yes, they were asked “How many months of the pregnancy did  
67 you/she take these medications?”

68

**69 Outcome**

70 Recurrent wheeze by 3 years of age was defined per the 2007 NIH asthma guidelines: 1) having  
71 at least 2 corticosteroid-requiring exacerbations within 6 months, or 2) having at least 4  
72 wheezing episodes within one year, each lasting at least one day and affecting sleep.<sup>(E2)</sup> This  
73 outcome was continually assessed by structured telephone interviews with the parents every 6  
74 months for the first 36 months of life. For all breathing problems detailed information was  
75 gathered including date of onset of symptoms, duration of symptoms, effect on sleep, medical  
76 care received, and medications used.

77

78

**79 Covariates**

80 At enrollment, the parent provided detailed information regarding multiple covariates including  
81 demographics of race/ethnicity (non-Hispanic white (NHW), non-Hispanic black (NHB),

82 Hispanic and other), insurance status, maternal and paternal history of allergic conditions  
83 (asthma, allergic rhinitis, food allergy and eczema), maternal smoking during pregnancy,  
84 gestational age at birth, child's birth weight, multiple gestation (e.g. twin), mode of delivery,  
85 maternal use of antibiotics during pregnancy and child's health prior to study enrollment.  
86 Household income at enrollment was estimated based on median household income by ZIP code  
87 obtained from Esri ArcGIS Business Analyst Desktop (Redlands, CA).

88

### 89 **Statistical Analysis**

90 Summary data on demographics and maternal factors were compared using Pearson's  $\chi^2$  for  
91 categorical variables and Mann-Whitney U test for continuous variables as appropriate.  
92 Unadjusted and adjusted hazard ratios (HR) were calculated using Cox proportional hazards  
93 modeling stratified by the age of the child at enrollment. The assumption of proportional hazards  
94 was verified using Schoenfeld residuals. The hazards for age at enrollment were not proportional  
95 over time, thus all multivariable models were specified to stratify by age. Two adjusted models  
96 were performed to assess for the effect of potential confounders. The first model adjusted for  
97 sociodemographic factors including sex, race/ethnicity and median household income. The fully  
98 adjusted model adjusted for sex, race/ethnicity, median household income, maternal history of  
99 atopy (asthma, allergic rhinitis, food allergy or eczema), maternal smoking during pregnancy,  
100 gestational age at birth, multiple gestation (e.g. twin), mode of delivery and maternal use of  
101 antibiotics during pregnancy prior to labor. All covariates included in the model were determined  
102 *a priori* based on the current understanding of the biologic model. We performed stratified  
103 analysis by race/ethnicity (NHW, NHB and Hispanic) including full adjustment for the potential  
104 confounders listed above. Additionally, we performed analysis based on duration of exposure to

105 ASM during pregnancy (No ASM use, < 2 months of use and  $\geq 2$  months of use) including full  
106 adjustment for potential confounders. Statistical significance was determined by a two-sided  
107  $P < 0.05$ .

108

## 109 **Results**

110

111 The exposed cohort was primarily composed of 65% (93/144) NHW children who were insured  
112 privately and had a median household income  $\geq$  \$40,000/year. (Table E1) There were no  
113 significant differences between the ASM exposed and unexposed groups in the types of viral  
114 pathogens isolated during the initial bronchiolitis event. There was no significant difference in  
115 the severity of initial bronchiolitis event (ICU admission and intubation). (Table E2)

116

117 Although statistical power was low, we performed an exploratory analysis in different  
118 racial/ethnic groups and found an adjusted HR above 1.00 for all three major groups: NHW 1.07  
119 (95%CI, 0.69-1.66), NHB 1.34 (95%CI, 0.65-2.79), and Hispanics 2.16 (95%CI 1.07-4.39); the  
120 excess risk among Hispanics with prenatal exposure to ASM was statistically significant  
121 ( $P_{\text{interaction}} = 0.045$ ).

122

123

124

125 **References**

126 E1. Hasegawa K, Stewart CJ, Celedon JC, Mansbach JM, Tierney C, Camargo CA Jr. Serum  
127 25-hydroxyvitamin D, metabolome, and bronchiolitis severity among infants: a multicenter  
128 cohort study. *Pediatr Allergy Immunol.* 2018;29(4):441-45.

129 E2. Expert Panel Report 3 (EPR-3): guidelines for the diagnosis and management of asthma-  
130 summary report 2007. *J Allergy Clin Immunol.* 2007;120(5 Suppl):S94-138.

131

132

133

134



135 Table E1. Baseline characteristics of infants hospitalized for bronchiolitis by prenatal acid  
 136 Data are expressed as n (%) unless otherwise indicated suppressant medication exposure and  
 137 development of recurrent wheeze  
 138

| Demographics                                         | Analytical cohort (n=900) | ASM exposed with recurrent wheeze (n=56) | ASM exposed without recurrent wheeze (n=88) | ASM unexposed with recurrent wheeze (n =233) | ASM unexposed without recurrent wheeze (n=523) | P value |
|------------------------------------------------------|---------------------------|------------------------------------------|---------------------------------------------|----------------------------------------------|------------------------------------------------|---------|
| Age at Enrollment-<br><i>months</i><br>[median(IQR)] | 3.22 (1.67-6.00)          | 4.47 (2.62-7.52)                         | 2.94 (1.38-5.63)                            | 3.58 (2.07-6.08)                             | 2.96 (1.51 – 5.91)                             | 0.47    |
| Sex                                                  |                           |                                          |                                             |                                              |                                                | 0.92    |
| Female                                               | 361 (40)                  | 20 (36)                                  | 35 (40)                                     | 95 (41)                                      | 211 (40)                                       |         |
| Male                                                 | 539 (60)                  | 36 (64)                                  | 53 (60)                                     | 138 (59)                                     | 312 (60)                                       |         |
| Race/Ethnicity                                       |                           |                                          |                                             |                                              |                                                | <0.001  |
| Non-Hispanic White                                   | 396 (44)                  | 32 (57)                                  | 61 (69)                                     | 104 (45)                                     | 199 (38)                                       |         |
| Non-Hispanic Black                                   | 201 (22)                  | 10 (18)                                  | 12 (14)                                     | 62 (27)                                      | 117 (22)                                       |         |
| Hispanic                                             | 268 (30)                  | 13 (23)                                  | 14 (16)                                     | 60 (26)                                      | 181 (35)                                       |         |
| Other                                                | 35 (4)                    | 1 (2)                                    | 1 (1)                                       | 7 (3)                                        | 26 (5)                                         |         |
| Insurance Status                                     |                           |                                          |                                             |                                              |                                                | <0.001  |
| Private                                              | 367 (41)                  | 29 (52)                                  | 59 (67)                                     | 84 (36)                                      | 195 (38)                                       |         |
| Public                                               | 519 (58)                  | 25 (45)                                  | 29 (33)                                     | 146 (63)                                     | 319 (61)                                       |         |
| Uninsured                                            | 12 (1)                    | 2 (4)                                    | 0                                           | 2 (1)                                        | 8 (2)                                          |         |
| Median Household Income                              |                           |                                          |                                             |                                              |                                                | 0.17    |
| < \$40,000 per year                                  | 304 (34)                  | 14 (25)                                  | 23 (26)                                     | 81 (35)                                      | 186 (36)                                       |         |
| ≥ \$ 40,000 per year                                 | 596 (66)                  | 42 (75)                                  | 65 (74)                                     | 152 (65)                                     | 337 (64)                                       |         |
| Gestational Age at Birth                             |                           |                                          |                                             |                                              |                                                | <0.001  |
| > 40 weeks                                           | 352 (39)                  | 20 (36)                                  | 18 (20)                                     | 93 (40)                                      | 221 (42)                                       |         |
| > 37 to 40 weeks                                     | 382 (42)                  | 20 (36)                                  | 39 (44)                                     | 101 (43)                                     | 222 (43)                                       |         |
| > 34 to 37 weeks                                     | 134 (15)                  | 10 (18)                                  | 29 (33)                                     | 28 (12)                                      | 67 (13)                                        |         |
| > 32 to 34 weeks                                     | 32 (4)                    | 6 (11)                                   | 2 (2)                                       | 11 (5)                                       | 13 (2)                                         |         |
| Birth Weight                                         |                           |                                          |                                             |                                              |                                                | 0.041   |
| < 5 lbs                                              | 57 (6)                    | 7 (13)                                   | 6 (7)                                       | 20 (9)                                       | 24 (5)                                         |         |

|                                       |          |         |         |          |          |         |
|---------------------------------------|----------|---------|---------|----------|----------|---------|
| ≥ 5 lbs                               | 838 (94) | 49 (88) | 82 (93) | 211 (91) | 496 (95) |         |
| Mode of Delivery                      |          |         |         |          |          | 0.07    |
| Vaginal                               | 589 (66) | 28 (50) | 57 (65) | 160 (69) | 344 (66) |         |
| C- Section                            | 310 (34) | 28 (50) | 31 (35) | 73 (31)  | 178 (34) |         |
| Multiple Birth (i.e. twin)            |          |         |         |          |          | < 0.001 |
| Yes                                   | 41 (5)   | 6 (11)  | 10 (11) | 6 (3)    | 19 (4)   |         |
| No                                    | 859 (95) | 50 (89) | 78 (89) | 227 (97) | 504 (96) |         |
| Maternal Antibiotics Prior to Labor   |          |         |         |          |          | 0.010   |
| Yes                                   | 242 (27) | 22 (40) | 30 (35) | 67 (29)  | 123 (24) |         |
| No                                    | 647 (73) | 33 (60) | 55 (65) | 161 (71) | 398 (76) |         |
| Maternal Smoking During Pregnancy     |          |         |         |          |          | 0.065   |
| Yes                                   | 123 (14) | 14 (25) | 11 (13) | 34 (15)  | 64 (12)  |         |
| No                                    | 776 (86) | 42 (75) | 77 (88) | 199 (85) | 458 (88) |         |
| Maternal History of Asthma            |          |         |         |          |          | <0.001  |
| Yes                                   | 192 (21) | 24 (43) | 21 (24) | 60 (26)  | 87 (17)  |         |
| No                                    | 702 (79) | 32 (57) | 66 (76) | 171 (74) | 433 (83) |         |
| Maternal History of Atopic Condition* |          |         |         |          |          | < 0.001 |
| Yes                                   | 208 (23) | 22 (39) | 28 (32) | 61 (26)  | 97 (19)  |         |
| No                                    | 689 (77) | 34 (61) | 59 (68) | 172 (74) | 424 (81) |         |

139

140

141 \*Atopic conditions include asthma, allergic rhinitis, food allergy and eczema. Abbreviations-

142 ASM: acid suppressant medications, C-section: cesarean section.

143

144

145

146 Table E2. Viral pathogens and severity of initial bronchiolitis event by prenatal acid suppressant  
 147 medication exposure

| <b>Characteristics of initial bronchiolitis event</b> | <b>ASM Exposed (n=144)</b> | <b>ASM Unexposed (n=756)</b> | <b>P value</b> |
|-------------------------------------------------------|----------------------------|------------------------------|----------------|
| <b>Viral Pathogen*</b>                                |                            |                              |                |
| HRV                                                   | 31 (22)                    | 152 (20)                     | 0.70           |
| RSV A                                                 | 86 (60)                    | 445 (59)                     | 0.85           |
| RSV B                                                 | 29 (20)                    | 180 (24)                     | 0.34           |
| Human metapneumovirus                                 | 7 (5)                      | 40 (5)                       | 0.83           |
| Coronavirus                                           | 5 (6)                      | 48 (6)                       | 0.72           |
| Adenovirus                                            | 5 (3)                      | 37 (5)                       | 0.46           |
| Mycoplasma                                            | 2 (1)                      | 9 (1)                        | 0.84           |
| Influenza A                                           | 2 (1)                      | 6 (1)                        | 0.49           |
| Influenza B                                           | 2 (1)                      | 3 (0.4)                      | 0.14           |
| Parainfluenza 1                                       | 0                          | 4 (1)                        | 0.38           |
| Parainfluenza 2                                       | 0                          | 2 (0.2)                      | 0.54           |
| Parainfluenza 3                                       | 3 (2)                      | 16 (2)                       | 0.98           |
| <b>ICU Admission</b>                                  |                            |                              | 0.98           |
| Yes                                                   | 21(15)                     | 111 (15)                     |                |
| No                                                    | 123(85)                    | 645 (85)                     |                |
| <b>Intubation</b>                                     |                            |                              | 0.33           |
| Yes                                                   | 3 (2)                      | 28 (4)                       |                |
| No                                                    | 141 (98)                   | 728 (96)                     |                |

148 Abbreviations: HRV: human rhinovirus, ICU: Intensive care unit, RSV: respiratory syncytial  
 149 virus. \*Children could have no virus detected, one virus or multiple viruses detected.

150  
 151

152 **Figure Legend**

153 Figure E1. Incidence of recurrent wheeze from birth to age 3 years by prenatal exposure to acid  
154 suppressant medications
